# Supplementary material for: Bismuth- and gadolinium-codoped carbon quantum dots with red/green dual emission for fluorescence/CT/T1-MRI mode imaging
Source: Royal Society of Chemistry journal article supplement (doi:10.1039/d2nj03420d), 2022-01-01
Supplement: d2nj03420d1.pdf [file d2nj03420d1.pdf]

## Supporting Information

### **Bismuth and gadolinium codoped carbon quantum dots with red/green dual emission for fluorescence /CT/T1-MRI mode imaging**

**Qin Meng<sup>a</sup>, Yun Wang<sup>b,\*</sup>, Chunxing Li<sup>a</sup>, Xiaoxi Hu<sup>a,b,\*</sup>**

*a. College of Chemistry and Chemical Engineering, Guangxi University, Nanning, Guangxi, 530003, People's Republic of China*

*b. School of Mechanical Engineering, Guangdong Songshan Polytechnic, Shaoguan, Guangdong, 512126, People's Republic of China*

\* Address correspondence to E-mail: wangyun750@126.com (Dr. Wang),  
klarke620@126.com (Dr. Hu)

#### **This file includes:**

**Fig. S1** XPS survey spectrum of Bi,Gd-CQDs.

**Fig. S2** Cytotoxic effect of various concentrations of undoped CQDs (0-250  $\mu\text{g}\cdot\text{mL}^{-1}$ ) on the HeLa cells after 24 h incubation.

**Table S1** Comparison of different Bi-doped nanoparticles as a CT imaging with other reported articles.

**Table S2** Comparison of different Gd-doped nanoparticles as a MRI nanoprobe with other reported articles.

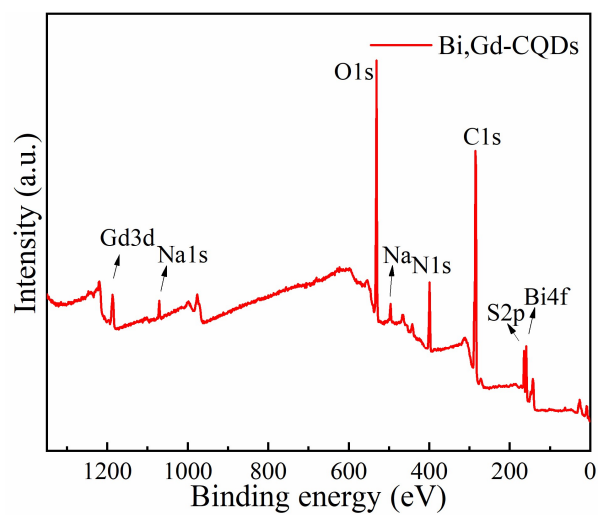

**Fig. S1.** XPS survey spectrum of Bi,Gd-CQDs.

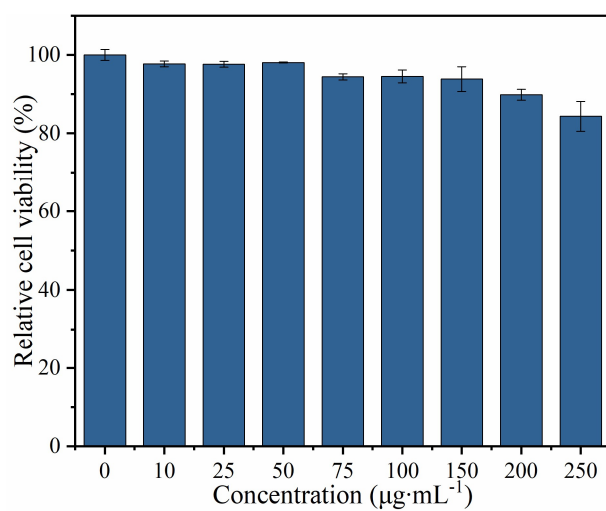

**Fig. S2.** Cytotoxic effect of various concentrations of undoped CQDs (0-250 µg·mL<sup>-1</sup>) on the HeLa cells after 24 h incubation.

**Table S1.** Comparison of different Bi-doped nanoparticles as a CT imaging with other reported articles.

| Probes                             | Main reactants       | Methods              | Bi resource                       | HU L g <sup>-1</sup> | Ref.         |
|------------------------------------|----------------------|----------------------|-----------------------------------|----------------------|--------------|
| Gd-PEG-Bi NPs                      | 1-dodecanethiol      | direct heating       | Bi(NO <sub>3</sub> ) <sub>3</sub> | 38.04                | <sup>1</sup> |
| Bi <sub>2</sub> S <sub>3</sub> NPs | bovine serum albumin | biomineralization    | Bi(NO <sub>3</sub> ) <sub>3</sub> | 85.40                | <sup>2</sup> |
| Bi-BSA NRs                         | polyvinylpyrrolidone | facile reduction     | Bi(NO <sub>3</sub> ) <sub>3</sub> | 66.70                | <sup>3</sup> |
| BFO-NPs                            | ethylene glycol      | glycol-based sol-gel | Bi(NO <sub>3</sub> ) <sub>3</sub> | >240                 | <sup>4</sup> |
| Bi,Gd-CQDs                         | p-phenylenediamine   | hydrothermal         | Bi(NO <sub>3</sub> ) <sub>3</sub> | 164.66               | This work    |

**Table S2.** Comparison of different Gd-doped nanoparticles as a MRI nanoprobe with other reported articles.

| Probes                 | Precursors                                           | Methods      | Gd resource                        | r1 (mM <sup>-1</sup> s <sup>-1</sup> ) | Ref.          |
|------------------------|------------------------------------------------------|--------------|------------------------------------|----------------------------------------|---------------|
| RCND-DTPA-Gd           | polythiophene<br>phenylpropionic acid                | chelation    | Gd(ClO <sub>4</sub> ) <sub>3</sub> | 5.17                                   | <sup>5</sup>  |
| Gd-CQDs                | Citric acid                                          | hydrothermal | GdCl <sub>3</sub>                  | 14.33                                  | <sup>6</sup>  |
| Gd-PDA NPs             | Dopamine hydrochloride                               | hydrothermal | GdCl <sub>3</sub>                  | 13.72                                  | <sup>7</sup>  |
| Gd <sup>3+</sup> -CQDs | gadopentetate<br>monomeglumine                       | hydrothermal | gadopentetate<br>monomeglumine     | 9.87                                   | <sup>8</sup>  |
| AS1411-Gd-CDs          | Citric acid                                          | solvothermal | GdCl <sub>3</sub>                  | 13.40                                  | <sup>9</sup>  |
| SiQD-Gd                | 3-<br>(trimethoxysilylpropyl)dieth<br>ylene triamine | chelation    | Gd(NO <sub>3</sub> ) <sub>3</sub>  | 4.2                                    | <sup>10</sup> |
| Bi,Gd-CQDs             | p-phenylenediamine                                   | hydrothermal | GdCl <sub>3</sub>                  | 4.29                                   | This work     |

## References

- 1 B. Wu, S. T. Lu, H. Yu, R. F. Liao, H. Li, B. V. Lucie Zafitatsimo, Y. S. Li, Y. Zhang, X. L. Zhu, H. G. Liu, H. B. Xu, S. W. Huang and Z. Cheng, *Biomaterials*, 2018, **159**, 37-47.
- 2 Y. Wang, Y. Wu, Y. Liu, J. Shen, L. Lv, L. Li, L. Yang, J. Zeng, Y. Wang, L. W. Zhang, Z. Li, M. Gao and Z. Chai, *Adv. Funct. Mater.*, 2016, **26**, 5335-5344.
- 3 Z. Li, Y. Hu, Z. Miao, H. Xu, C. Li, Y. Zhao, Z. Li, M. Chang, Z. Ma, Y. Sun, F. Besenbacher, P. Huang and M. Yu, *Nano Lett.*, 2018, **18**, 6778-6788.
- 4 A. Rajaei, X. Wensheng, L. Zhao, S. Wang, Y. Liu, Z. Wu, J. Wang and F. Si-Shen, *J. Biomed. Nanotechnol.*, 2018, **14**, 1159-1168.
- 5 D.-K. Ji, G. Reina, H. Liang, D. Zhang, S. Guo, B. Ballesteros, C. Ménard-Moyon, J. Li and A. Bianco, *ACS Appl. Nano Mater.*, 2021, **4**, 1467-1477.
- 6 C. Yu, T. Xuan, Y. Chen, Z. Zhao, X. Liu, G. Lian and H. Li, *J. Alloys Compd.*, 2016, **688**, 611-619.
- 7 Y. Pu, Y. Zhu, Z. Qiao, N. Xin, S. Chen, J. Sun, R. Jin, Y. Nie and H. Fan, *J Mater Chem B*, 2021, **9**, 1846-1857.
- 8 X. Y. Ren, X. X. Yuan, Y. P. Wang, C. L. Liu, Y. Qin, L. P. Guo and L. H. Liu, *Opt. Mater.*, 2016, **57**, 56-62.
- 9 M. Jiao, Y. Wang, W. Wang, X. Zhou, J. Xu, Y. Xing, L. Chen, Y. Zhang, M. Chen, K. Xu and S. Zheng, *Chem. Eng. J.*, 2022, **440**, 135965.
- 10 F. Xiao, Y. Xiao, F. Chen, X. Liu, C. Lin, J. Chen and Y. Wu, *Talanta*, 2019, **199**, 336-346.
